# Supplementary material for: Stereoselectivity in electron-transfer reactions in chiral media
Source: Royal Society of Chemistry journal article supplement (doi:10.1039/b918574g), 2009-12-02
Supplement: b918574g.pdf [file b918574g.pdf]

Electronic Supplementary Information for Dalton Transactions  
This journal is © The Royal Society of Chemistry 2010

Contribution from University of Notre Dame

Department of Chemistry and Biochemistry

251 Nieuwland Science Hall

Notre Dame, Indiana 46556-5670

## **Stereoselectivity in Electron Transfer Reactions in Chiral Media**

by

Deborah Olmstead, Xiaio Hua, Peter Osvath and A. Graham Lappin\*

**Supplementary Materials:**

Table S1. Second order rate constants,  $k_{so}$ , as a function of pH in 0.01 M acetate buffer and 0.10 M ionic strength (NaNO<sub>3</sub>) at 25 °C.

| pH   | $k_{so}$ (M <sup>-1</sup> s <sup>-1</sup> ) | pH                | $k_{so}$ (M <sup>-1</sup> s <sup>-1</sup> ) |
|------|---------------------------------------------|-------------------|---------------------------------------------|
| 3.92 | 5.7(1.1) x 10 <sup>4</sup>                  | 5.45              | 6.1(1.0) x 10 <sup>4</sup>                  |
| 4.15 | 7.3(1.2) x 10 <sup>4</sup>                  | 5.61              | 6.8(0.8) x 10 <sup>4</sup>                  |
| 4.18 | 5.6(0.8) x 10 <sup>4</sup>                  | 5.80              | 7.6(0.8) x 10 <sup>4</sup>                  |
| 4.40 | 5.8(1.5) x 10 <sup>4</sup>                  | 6.30              | 6.7(0.3) x 10 <sup>4</sup>                  |
| 4.59 | 6.1(1.1) x 10 <sup>4</sup>                  | 6.30 <sup>a</sup> | 8.8(1.1) x 10 <sup>4</sup>                  |
| 4.85 | 5.5(0.8) x 10 <sup>4</sup>                  | 6.30 <sup>b</sup> | 9.8(1.2) x 10 <sup>4</sup>                  |
| 4.95 | 5.8(0.8) x 10 <sup>4</sup>                  | 6.62              | 6.6(1.1) x 10 <sup>4</sup>                  |
| 5.24 | 6.9(0.8) x 10 <sup>4</sup>                  |                   |                                             |

<sup>a</sup> [[Co(en)<sub>3</sub>]<sup>3+</sup>] = 1.5 x 10<sup>-3</sup> M. <sup>b</sup> [[Co(en)<sub>3</sub>]<sup>3+</sup>] = 3.0 x 10<sup>-3</sup> M.

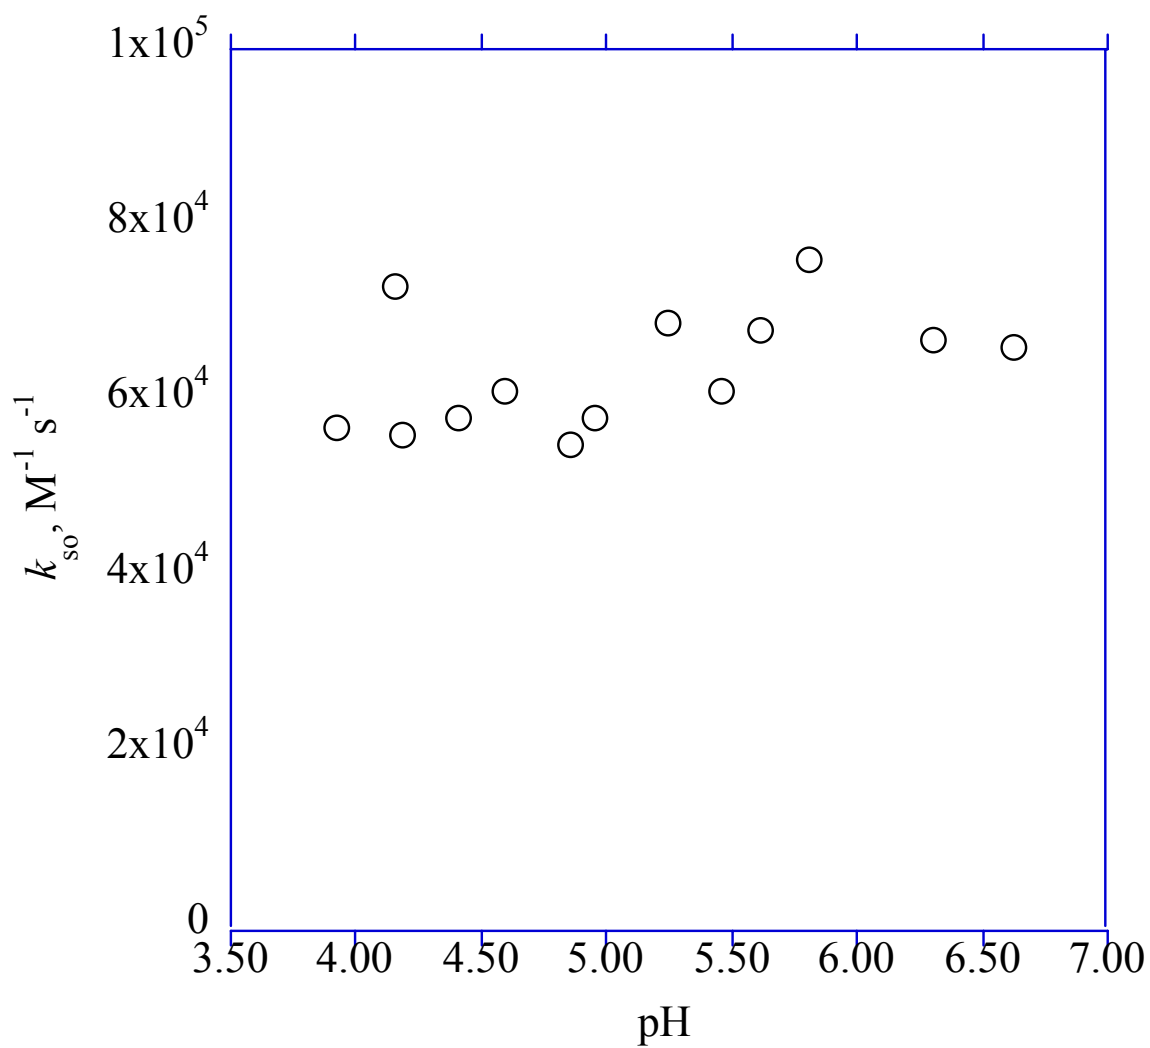

Figure S1 Plot of the second-order rate constant,  $k_{so}$ , for oxidation of  $[Co(edta)]^{2-}$  by  $[IrCl_6]^{2-}$  as a function of pH
